# Supplementary material
Source: Springer Nature journal article supplement (https://www.springermedizin.de/resource/supplementary/13012_2013_708_MOESM9_ESM.pdf/9630292)
Supplement: MOESM9 [file 9630292]

### **Characteristics of the organization**

- Focus areas of the organization (+)
- Available means (+)
- Opinion of other managers
- Size of the region that needs to be covered (+)

### **Characteristics of the innovation**

- Effect of the intervention / additional value (+)
- Balance between cost and effects (-)

### **Characteristics of the social system**

- Demand for treatment according to COTiD (+)
- Reimbursement (+)

**Hours of OT available**

```
graph LR; A["Characteristics of the organization"] -.-> D["Hours of OT available"]; B["Characteristics of the innovation"] -.-> D; C["Characteristics of the social system"] -.-> D;
```
